# Supplementary material for: Experimental Selection for Drosophila Survival in Extremely Low O2 Environment
Source: PLoS One. 2007 May 30;2(5):e490. doi: 10.1371/journal.pone.0000490 (PMC1871610; doi:10.1371/journal.pone.0000490)
Supplement: Table S2 — Eclosion rate of P-element alleles in hypoxic condition (0.04 MB XLS) [file pone.0000490.s002.xls]

## Sheet: Supplementary Table 2
Table S2: Eclosion rate of P-element alleles in hypoxic condition
Stock	Symbo	Genotype	Eclosion (%)
10077	Aats-met	w[1118]; PBac{w[+mC]=PB}Aats-met[c00449]/TM6B, Tb[1]	4.12371
10679	Acer	y[1] w[67c23]; P{w[+mC]=lacW}Acer[k07704]/CyO	15.4696
EP(3)0857	alpha-Man-IIb		8.33333
13867	alpha-Man-IIb	y[1] w[67c23]; ry[506] P{y[+mDint2] w[BR.E.BR]=SUPor-P}alpha-Man-IIb[KG05078]	15.873
13873	alpha-Man-IIb	y[1] w[67c23]; ry[506] P{y[+mDint2] w[BR.E.BR]=SUPor-P}KG05115	66.9643
19996	alpha-Man-IIb	y[1] w[67c23]; P{w[+mC] y[+mDint2]=EPgy2}EY03461	79.4304
16853	asp	y[1] w[67c23]; P{w[+mC] y[+mDint2]=EPgy2}EY07687	47.5728
EP(3)3490	Atu		17.1717
EP(3)0667	bam		52.8926
19911	bam	y[1] w[67c23]; P{w[+mC] y[+mDint2]=EPgy2}bam[EY03755]	NA
EP(3)3668	Best1		43.9024
5-SZ-3924	Best1		74.2574
16879	Best1	y[1] w[67c23]; P{w[+mC] y[+mDint2]=EPgy2}EY08208	48.2759
EP(X)1515	br		68.323
10832	br	P{w[+mC]=lacW}br[G0318] w[67c23]/FM7c	44.0678
10858	br	P{w[+mC]=EP}br[EP1515] w[1118]	61.4583
13801	br	y[1] P{y[+mDint2] w[BR.E.BR]=SUPor-P}KG04048	17.8248
14282	br	y[1] P{y[+mDint2] w[BR.E.BR]=SUPor-P}KG05923	36.8421
15305	br	y[1] P{w[+mC] y[+mDint2]=EPgy2}br[EY00662] w[67c23]	17.4061
15234	CG10336	y[1]; P{y[+mDint2] w[BR.E.BR]=SUPor-P}CG10336[KG10159]/CyO; ry[506]	69.3333
16673	CG10340	y[1] w[67c23]; P{w[+mC] y[+mDint2]=EPgy2}CG10340[EY05785]	80.9524
l(2)SH0566	CG10955		81.9672
14590	CG11034	y[1] w[67c23]; P{w[+mC] y[+mDint2]=EPgy2}CG10340[EY05785]	35.6164
EP(2)2597	CG11070		43.8735
12411	CG11376	w[1118]; P{w[+mGT]=GT1}CG11376[BG00267]	77.8169
15973	CG13091	y[1] w[67c23]; P{w[+mC] y[+mDint2]=EPgy2}CG13091[EY06744]	74.7126
21361	CG13091	y[1] w[67c23]; P{w[+mC] y[+mDint2]=EPgy2}lmg[EY11317]/CyO	NA
CB-5863-3	CG13745		68.6131
11702	CG13822	ry[506] P{ry[+t7.2]=PZ}l(3)06906[06906]/TM3, ry[RK] Sb[1] Ser[1]	53.5714
13082	CG14411	y[1] P{y[+mDint2] w[BR.E.BR]=SUPor-P}CG14411[KG00307a]	44
13622	CG15435	y[1] w[67c23]; P{y[+mDint2] w[BR.E.BR]=SUPor-P}KG05006	39.6552
11764	CG17098	P{ry[+t7.2]=PZ}dbf[1] cn[1]/CyO; ry[506]	53.8835
12471	CG18182	w[1118] P{w[+mGT]=GT1}BG01461	71.4286
12488	CG1837	w[1118] P{w[+mGT]=GT1}CG1837[BG00450]	65.9091
16432	CG2118	y[1] w[67c23]; P{w[+mC] y[+mDint2]=EPgy2}Acf1[EY08629]	61.3208
12852	CG2943	w[1118]; P{w[+mGT]=GT1}CG2943[BG02000]/TM3, Sb[1] Ser[1]	68.4783
CB-0762-3	CG31792		44.7368
12979	CG3215	y[1] P{y[+mDint2] w[BR.E.BR]=SUPor-P}kat80[KG02315]	0
10205	CG32451	y[1] w[1118]; P{w[+mC]=lacW}l(3)L7251[L7251]/TM3, Ser[1]	6.06061
EP(X)1400	CG3249		65.5022
11236	CG3249	w[1118] P{w[+mC]=EP}CG3249[EP1400]	49.5327
12879	CG3249	y[1] P{y[+mDint2] w[BR.E.BR]=SUPor-P}CG3249[KG02745]	12.7451
19934	CG3249	y[1] w[67c23] P{w[+mC] y[+mDint2]=EPgy2}CG3249[EY08737]	64.3154
13892	CG3344	y[1] w[67c23]; P{y[+mDint2] w[BR.E.BR]=SUPor-P}KG05272 ry[506]	64.6884
13255	CG3523	w[1118]; P{y[+mDint2] w[BR.E.BR]=SUPor-P}CG3523[KG03696]/CyO, P{ry[+t7.2]=sevRas1.V12}FK1	NA
15955	CG3523	y[1] w[67c23]; P{w[+mC] y[+mDint2]=EPgy2}EY05632/CyO	58.3333
18373	CG4389	w[1118]; PBac{w[+mC]=WH}CG4389[f00822]/CyO	0
14181	CG4949	y[1] P{y[+mDint2] w[BR.E.BR]=SUPor-P}KG02163	19.281
13634	CG4968	y[1] w[67c23]; P{y[+mDint2] w[BR.E.BR]=SUPor-P}CG4968[KG05146]	50
17812	CG5970	w[1118]; PBac{w[+mC]=RB}CG5970[e00083]/CyO	1.25
18323	CG6164	w[1118]; PBac{w[+mC]=WH}CG6164[f00379]	0
16408	CG7003	y[1] w[67c23]; P{w[+mC] y[+mDint2]=EPgy2}CG7003[EY07308]	46.8354
10757	CG7015	w[1118]; PBac{w[+mC]=PB}CG7015[c01923]	0
CB-6537-3	CG7102		74.5098
13685	CG7102	y[1]; P{y[+mDint2] w[BR.E.BR]=SUPor-P}KG00625/CyO; ry[506]	72.5
CB-5504-3	CG7170		76.8817
16970	CG7177	y[1] w[67c23]; P{w[+mC] y[+mDint2]=EPgy2}CG7177[EY10165]/TM3, Sb[1] Ser[1]	87.7778
17472	CG7492	y[1] w[67c23]; P{w[+mC] y[+mDint2]=EPgy2}CG7492[EY08553] CG32373[EY08553]	78.5714
12940	CG8116	y[1] w[67c23]; P{y[+mDint2] w[BR.E.BR]=SUPor-P}CG8116[KG00606] ry[506]	71.1409
12748	CG9171	w[1118]; P{w[+mGT]=GT1}CG9171[BG02425]	58.2524
16064	CG9171	y[1] w[1118]; PBac{w[+mC]=5HPw[+]}A192	0
19804	CG9171	y[1] w[67c23]; P{w[+mC] y[+mDint2]=EPgy2}CG9171[EY10262]	80.4805
5-HA-1715	CG9171		73.913
CB-0695-3	CG9171		59.1837
l(2)SH1185	CG9171		71.875
14526	CG9259	y[1] w[67c23]; P{y[+mDint2] w[BR.E.BR]=SUPor-P}KG07337	56
15517	CG9620	y[1] w[67c23]; P{w[+mC] y[+mDint2]=EPgy2}EY01553	41.7647
17392	CG9826	y[1] w[67c23]; P{w[+mC] y[+mDint2]=EPgy2}EY07709	71.4286
17340	D1	y[1] w[67c23]; P{w[+mC] y[+mDint2]=EPgy2}D1[EY05004]/TM3, Sb[1] Ser[1]	60.4938
EP(3)3280	dco		23.4783
12164	dco	y[1] w[*]; P{w[+mC]=lacW}dco[j3B9]/TM3, Sb[1]	72.5
19662	dco	y[1] w[67c23]; P{w[+mC] y[+mDint2]=EPgy2}dco[EY02910]	69.8864
l(3)S053813	dco		3.57143
l(3)S091510	dco		86.8421
l(3)S139602	dco		38.7097
l(3)S144701	dco		33.8235
l(3)S146009	dco		51.1905
13968	dnc	y[1] P{y[+mDint2] w[BR.E.BR]=SUPor-P}KG03901	20.2532
15703	dnc	y[1] w[67c23] P{w[+mC] y[+mDint2]=EPgy2}EY04001	30
EP(2)0813	dpld		4
EP(2)1050	dpld		1.8018
EP(2)2291	dpld		0
CB-6430-3	dpld		80
10818	dpld	y[1] w[67c23]; P{w[+mC]=lacW}dpld[k08815a] P{lacW}k08815b/CyO	10.7143
14674	dpld	y[1] w[67c23]; P{y[+mDint2] w[BR.E.BR]=SUPor-P}dpld[KG07955]	11.399
EP(X)1336	fs(1)N		5.29801
CB-6160-3	fs(1)N		87.5
10595	fs(1)N	P{w[+mC]=EP}fs(1)N[EP1336] w[1118]	33.6449
18177	fs(1)Ya	PBac{w[+mC]=RB}fs(1)Ya[e03625] w[1118]	NA
10771	fs(2)ltoPP43	y[1] w[67c23]; P{w[+mC]=lacW}fs(2)ltoPP43[k08115]/CyO	7.76699
20159	fs(2)ltoPP43	y[1] w[67c23]; P{w[+mC] y[+mDint2]=EPgy2}fs(2)ltoPP43[EY06640]	50.3876
16941	gcl	y[1] w[67c23]; P{w[+mC] y[+mDint2]=EPgy2}gcl[EY09611]	65.9574
EP(3)3315	Hsp26		39.5604
EP(3)3336	Hsp26		0
13232	Hsp26	y[1] w[67c23]; P{y[+mDint2] w[BR.E.BR]=SUPor-P}KG02786	66.6667
13268	Hsp27	y[1] w[67c23]; P{y[+mDint2] w[BR.E.BR]=SUPor-P}Hsp27[KG03935] ry[506]	78.9474
20107	Hsp27	y[1] w[67c23]; P{w[+mC] y[+mDint2]=EPgy2}Hsp27[EY01101]	81.5789
EP(3)0329	Hsp27		0
EP(3)3220	Hsp27		6.45161
EP(3)3615	Hsp27		9.42029
13007	Jon65Ai	y[1] w[67c23]; P{y[+mDint2] w[BR.E.BR]=SUPor-P}Jon65Ai[KG03203] ry[506]	37.8182
16002	Klp31E	y[1] w[67c23]; P{w[+mC] y[+mDint2]=EPgy2}EY08009	27.204
15271	l(2)NC136	y[1]; P{y[+mDint2] w[BR.E.BR]=SUPor-P}l(2)NC136[KG10496]/CyO; ry[506]	58.8235
5-HA-1051	lin19		68
10494	lin19	w[*]; P{w[+mC]=lacW}lin19[k01207]/CyO, P{ry[+t7.2]=sevRas1.V12}FK1	61.6
12764	lin19	w[1118]; P{w[+mGT]=GT1}lin19[BG02329]	35.7143
20813	lin19	y[1] w[67c23]; P{w[+mC] y[+mDint2]=EPgy2}lin19[EY11668]/CyO	43.1579
EP(3)3349	Mdh		40.1869
CB-5364-3	Mdh		77.7778
13198	Mdh	y[1] w[67c23]; ry[506] P{y[+mDint2] w[BR.E.BR]=SUPor-P}KG02266	54.023
19342	Mdh	w[1118]; P{w[+mC]=XP}Mdh[d11068]/TM6B, Tb[1]	0
20110	Mdh	y[1] w[67c23]; P{w[+mC] y[+mDint2]=EPgy2}Mdh[EY01197]	74.0741
15679	mei-P26	y[1] w[67c23] P{w[+mC] y[+mDint2]=EPgy2}EY03816	32.9609
10995	Mhc	y[1] w[67c23]; P{w[+mC]=lacW}Mhc[k10423]/CyO	20.3883
16143	ND23/spn-E	y[1] w[1118]; PBac{w[+mC]=5HPw[+]}ND23[B117]	31.0345
4369	neur	P{ry[+t7.2]=lArB}neur[A101] ry[506]/TM3, ry[RK] Sb[1] Ser[1]	68.2927
6393	neur	w[1118]; P{w[+mW.hs]=GawB}neur[GAL4-A101] Kg[V]/TM3, Sb[1]	29.8246
12124	neur	y[1] w[*]; P{w[+mC]=lacW}neur[j6B12]/TM3, Sb[1]	2.84553
18724	nod	w[1118] PBac{w[+mC]=WH}nod[f04008]	NA
20065	nod	y[1] w[67c23] P{w[+mC] y[+mDint2]=EPgy2}nod[EY01772]	NA
12143	nos	y[1] w[*]; P{w[+mC]=lacW}nos[j3B6]/TM3, Sb[1]	56.6929
11042	olf186-F	y[1] w[67c23]; P{w[+mC]=lacW}olf186-F[k11505]/CyO	3.84615
17538	olf186-F	y[1] w[67c23]; P{w[+mC] y[+mDint2]=EPgy2}olf186-F[EY09167]/In(2LR)Gla	70.8333
20119	olf186-F	y[1] w[67c23]; P{w[+mC] y[+mDint2]=EPgy2}olf186-F[EY01467]	69.898
20848	olf186-F	y[1] w[67c23]; P{w[+mC] y[+mDint2]=EPgy2}EY12945/CyO	15.5963
5-SZ-3325	olf186-F		78.6885
5-SZ-3357	olf186-F		68.8623
CB-0148-3	olf186-F		74.0741
10781	ome	w[1118]; PBac{w[+mC]=PB}ome[c01991]	6.66667
14384	ome	y[1] w[67c23]; P{y[+mDint2] w[BR.E.BR]=SUPor-P}ome[KG01712] ry[506]	79.3814
l(2)SH1560	PGRP-SC2		31.2139
16111	pho	y[1] w[1118]; PBac{w[+mC]=5HPw[+]}A426/pho[1]	18.4049
15761	pr-set7	y[1] w[67c23]; P{w[+mC] y[+mDint2]=EPgy2}pr-set7[EY04668]/TM3, Sb[1] Ser[1]	52.9412
14041	ras	y[1] P{y[+mDint2] w[BR.E.BR]=SUPor-P}ras[KG06484]	31.25
CB-5194-3	ScpX		70.1149
17635	sec6	y[1] w[67c23]; P{w[+mC] y[+mDint2]=EPgy2}Atg7[EY10058]	78.4173
15126	sec6	y[1]; P{y[+mDint2] w[BR.E.BR]=SUPor-P}KG08199/CyO; ry[506]	63.9535
16492	Ser4	y[1]; P{y[+mDint2] w[BR.E.BR]=SUPor-P}Marcal1[KG09850]/CyO	35.1852
14442	spz	y[1] w[67c23]; ry[506] P{y[+mDint2] w[BR.E.BR]=SUPor-P}spz[KG05402]	NA
11533	stg	ry[506] P{ry[+t7.2]=PZ}Atpalpha[01453a] P{PZ}stg[01453b]/TM3, ry[RK] Sb[1] Ser[1]	76.8116
11525	stg	ry[506] P{ry[+t7.2]=PZ}stg[01235]/TM3, ry[RK] Sb[1] Ser[1]	7.31707
EP(3)3215	Syx1A		0
11697	Syx1A	ry[506] P{ry[+t7.2]=PZ}Syx1A[06737]/TM3, ry[RK] Sb[1] Ser[1]	35.9551
l(2)SH1604	T3dh		32.5
13339	TppII	y[1]; P{y[+mDint2] w[BR.E.BR]=SUPor-P}TppII[KG03294]/CyO; ry[506]	79.6748
11215	zip	cn[1] P{ry[+t7.2]=PZ}zip[02957]/CyO; ry[506]	70.5882
P-element insertion lines for up-regulated genes:
EP(2)0398	CG1600		3.72671
EP(2)2327	CG1600		4.93827
EP(2)2179	CG30492		0.598802
13213	CG30492	y[1] w[67c23]; P{y[+mDint2] w[BR.E.BR]=SUPor-P}KG02360	17.1
EP(3)3003	CG32030		4.80769
11540	CG32030	P{ry[+t7.2]=PZ}l(3)01629[01629] ry[506]/TM3, ry[RK] Sb[1] Ser[1]	9.8
12073	CG32030	y[1] w[*]; P{w[+mC]=lacW}l(3)j5B6[j5B6]/TM3, Sb[1]	39.7849
11101	Cyt-b5-r	P{ry[+t7.2]=PZ}Cyt-b5[01857], cn[1]/CyO; ry[506]	87.3684
5-HA-1492	Cyt-b5-r		84.507
EP(2)2230	GstE1		2.39234
EP(3)3200	Hph		0.961538
11561	Hph	P{ry[+t7.2]=PZ}Hph[02255] ry[506]/TM3, ry[RK] Sb[1] Ser[1]	42.5926
EP(2)0748	Hrb27C		3.27869
11204	Hrb27C	P{ry[+t7.2]=PZ}Hrb27C[02647] cn[1]/CyO; ry[506]	14.3
15576	Pu	y[1] w[67c23]; P{w[+mC] y[+mDint2]=EPgy2}Pu[EY02616a]	57.7778
16694	Pu	y[1] w[67c23]; P{w[+mC] y[+mDint2]=EPgy2}EY06023	74.7312
12121	puc	y[1] w[*]; P{w[+mC]=lacW}puc[j4E1]/TM3, Sb[1]	4.1
13363	puc	y[1] w[67c23]; P{y[+mDint2] w[BR.E.BR]=SUPor-P}puc[KG04275] ry[506]	10.5
EP(3)3279	th		8.33333
EP(3)3723	th		10
12093	th	y[1] w[*]; P{w[+mC]=lacW}th[j5C8]/TM3, Sb[1]	7.4
